September 2012

# PSYCHIATRIC SERVICES

A Journal of the  
American Psychiatric  
Association

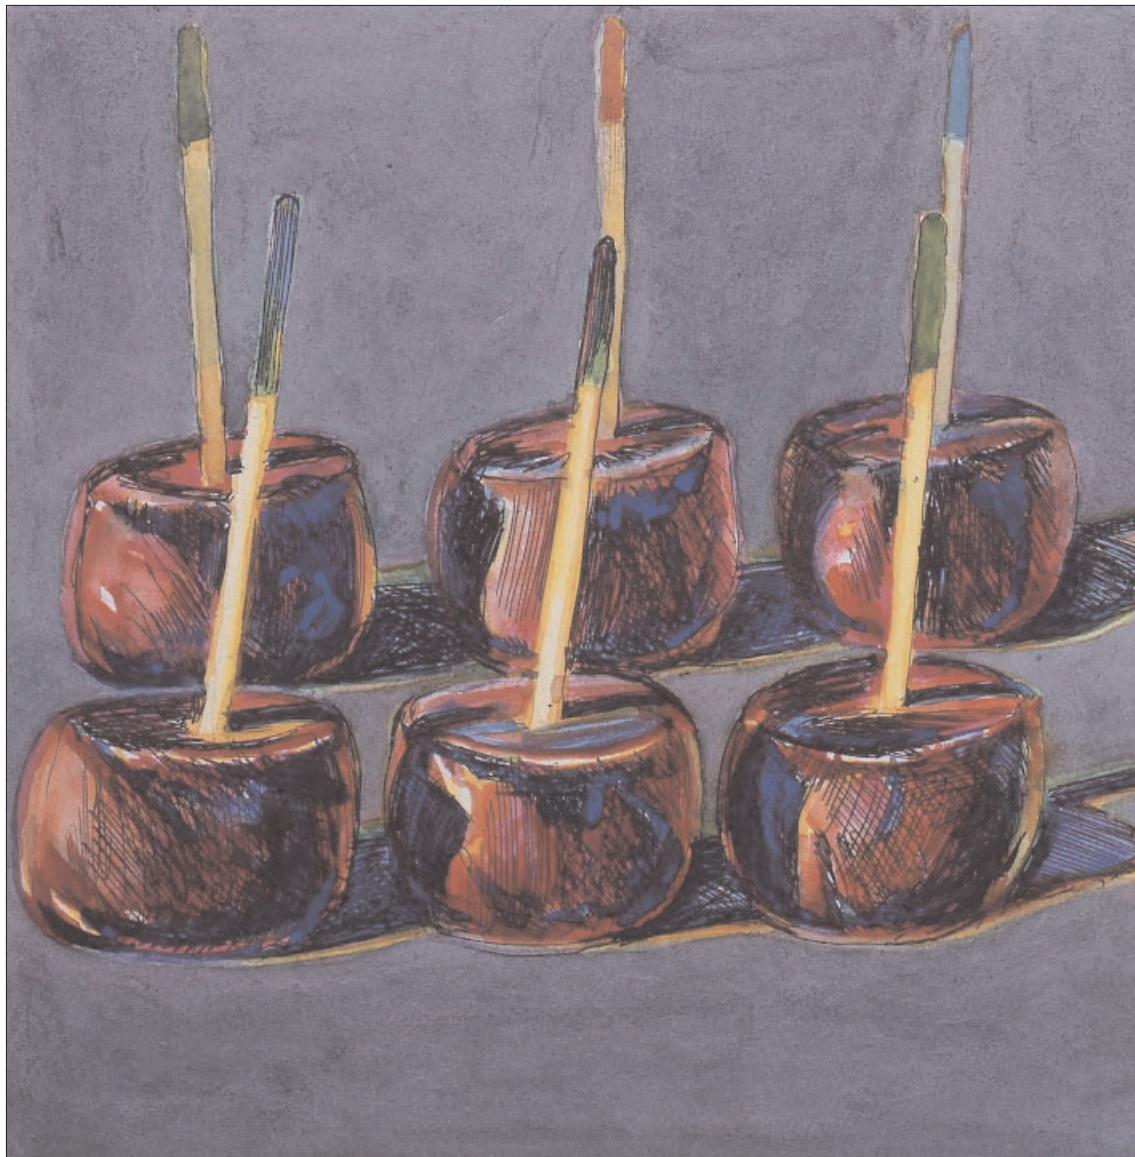

◆ Treatment Seeking by  
Veterans With PTSD:  
Two Research Reports

◆ Clinician-Perceived Honesty:  
A Factor in Racial Disparities  
in Schizophrenia Diagnosis?

◆ Adapting DBT to  
Inpatient Settings:  
A Literature Review
