# TAKING ISSUE

## Diagnostic Bias: Racial and Cultural Issues

A study by Eack and colleagues reported in this issue found that African Americans were more than three times as likely as whites to receive a schizophrenia diagnosis. Study clinicians were asked, “Did the patient appear to be responding honestly?” Data analyses indicated that the disparity was strongly related to perceived honesty. Apparently, the clinicians did not trust African Americans’ responses to queries about their symptoms and may have made diagnostic inferences based on a suspicion of symptom denial, poor insight, or uncooperativeness.

Diagnosis of psychotic disorders has been subject to different types of bias over the years. International studies documented an overdiagnosis of schizophrenia in the United States compared with England. In those early studies, a key observation was that psychiatrists trained in America gave more attention to psychotic symptoms and less attention to mood changes in making a diagnosis. In the 1980s, the Epidemiologic Catchment Area study reported similar rates of schizophrenia across U.S. racial-ethnic groups, but clinical studies began documenting an excess of schizophrenia diagnoses among African Americans, even when structured interviews or blinded assessments were used, which seemed to result from inherent biases. Clinicians seem to “overvalue” psychotic symptoms among African Americans and this skews diagnoses toward schizophrenia.

In England, high rates of psychosis have been reported among Afro-Caribbean immigrants in both epidemiological and clinical studies, even though rates of psychotic disorders in Jamaica are not notably high. Diagnoses of psychosis given to Afro-Caribbeans by white psychiatrists may be based on the notion that the person is “strange, undesirable, bizarre, aggressive, and dangerous.”

Humans have a propensity to label people or things on the basis of initial impressions. A single word or event colors perceptions and serves as a lens or construct that influences judgments. In diagnosing schizophrenia, bias may include elements of discrimination and stigma. In clinical venues, it is likely that schizophrenia may be more stigmatized than other disorders, given historical assumptions about its predominance in lower socioeconomic groups and its having a poor outcome. White clinicians may view black patients with suspicion and fail to understand cultural nuances that may provide clues about other diagnoses.

The disparity does not appear to affect other U.S. minority groups, such as Hispanics. Although structured interviews and instruments that force examiners to focus on objective data are helpful, there is much evidence to indicate that no matter how much we operationalize or structure the process, psychiatric diagnosis is not yet “color blind.” Training that emphasizes awareness of potential biases and detailed vignettes highlighting cultural nuances and types of clinical presentation is essential.—JAVIER I. ESCOBAR, M.D., *University of Medicine and Dentistry of New Jersey—Robert Wood Johnson Medical School*

*Psychiatric Services*, established in 1950, is published monthly by the American Psychiatric Association for mental health professionals and others concerned with treatment and services for persons with mental illnesses and mental disabilities, in keeping with APA’s objectives to improve care and treatment, to promote research and professional education in psychiatric and related fields, and to advance the standards of all psychiatric services and facilities.

### Editor

Howard H. Goldman, M.D., Ph.D.

### Editorial Board

David A. Adler, M.D.  
Javier I. Escobar, M.D.  
Stephen M. Goldfinger, M.D.  
Richard K. Harding, M.D.  
Roberto Lewis-Fernández, M.D.  
Grayson S. Norquist, M.D., M.S.P.H.  
Martha Sajatovic, M.D.  
Gregory E. Simon, M.D., M.P.H.  
Bradley D. Stein, M.D., Ph.D.  
Marvin S. Swartz, M.D.  
Marcia Valenstein, M.D.  
Bonnie T. Zima, M.D., M.P.H.

### Editor Emeritus

John A. Talbott, M.D.

### Book Review Editor

Jeffrey L. Geller, M.D., M.P.H.

### Contributing Editors

Paul S. Appelbaum, M.D., *Law & Psychiatry*  
José Miguel Caldas de Almeida, M.D., and Marcela Horvitz-Lennon, M.D., M.P.H., *Mental Health Care Reforms in Latin America*  
Francine Cournois, M.D., and Stephen M. Goldfinger, M.D., *Frontline Reports*  
Lisa B. Dixon, M.D., M.P.H., and Brian Hepburn, M.D., *Public-Academic Partnerships*  
Jeffrey L. Geller, M.D., M.P.H., *Personal Accounts*  
William M. Glazer, M.D., *Best Practices*  
Amy M. Kilbourne, Ph.D., M.P.H., and Tami L. Mark, Ph.D., *Datapoints*  
Matt Muijen, M.D., Ph.D., *Mental Health Care Reforms in Europe*  
Fred C. Osher, M.D., *State Mental Health Policy*  
Jules M. Ranz, M.D., and Susan M. Deakins, M.D., *Case Studies in Public-Sector Leadership*  
Steven S. Sharfstein, M.D., Haiden A. Huskamp, Ph.D., and Alison Evans Cuellar, Ph.D., *Economic Grand Rounds*

### Statistical Consultant

Deborah R. Medoff, Ph.D.

### Editorial Consultants

Joseph M. Cerimele, M.D.  
Julie M. Donohue, Ph.D.  
Robert E. Drake, M.D., Ph.D.  
M. Susan Ridgely, J.D.  
Laura Van Tosh

### Editorial Staff

Constance Grant Gartner, *Managing Editor*  
Demarie S. Jackson, *Associate Editor*  
Kathleen Stearman, *Associate Editor*  
Wendy Lieberman Taylor, *Production Manager*  
Y. Nicole Gray, *Editorial Support Services Manager*

### Publisher

Rebecca D. Rinehart

### American Psychiatric Association

Dilip V. Jeste, M.D., *President*  
Jeffrey A. Lieberman, M.D., *President-Elect*  
Roger Peele, M.D., *Secretary*  
David Fassler, M.D., *Treasurer*  
R. Scott Benson, M.D., *Speaker; APA Assembly*  
James H. Scully, M.D., *Medical Director and CEO*
